# Supplementary material
Source: PubMed Central journal article supplement (PMC4134769)
Supplement: NIHMS593480-supplement-Supporting_information.pdf [file NIHMS593480-supplement-Supporting_information.pdf]

# Supporting Information

## Phosphorylcholine-Coated Semiconducting Polymer Nanoparticles as Rapid and Efficient Labeling Agents for *in vivo* Cell Tracking

*Kanyi Pu,<sup>†,¶</sup> Adam J. Shuhendler,<sup>†,¶</sup> Maija P. Valta,<sup>‡,§,¶</sup> Lina Cui,<sup>†</sup> Matthias Saar,<sup>‡,¶</sup>*

*Donna M. Peehl,<sup>‡</sup> and Jianghong Rao<sup>\*,†</sup>*

<sup>†</sup>Molecular Imaging Program at Stanford, Department of Radiology School of Medicine,  
Stanford University,

<sup>‡</sup>Department of Urology School of Medicine, Stanford University, USA

<sup>§</sup>Division of Medicine, Turku University Hospital and University of Turku, Finland

<sup>¶</sup>Department of Urology and Pediatric Urology University of Saarland, Homburg/Saar,  
Germany

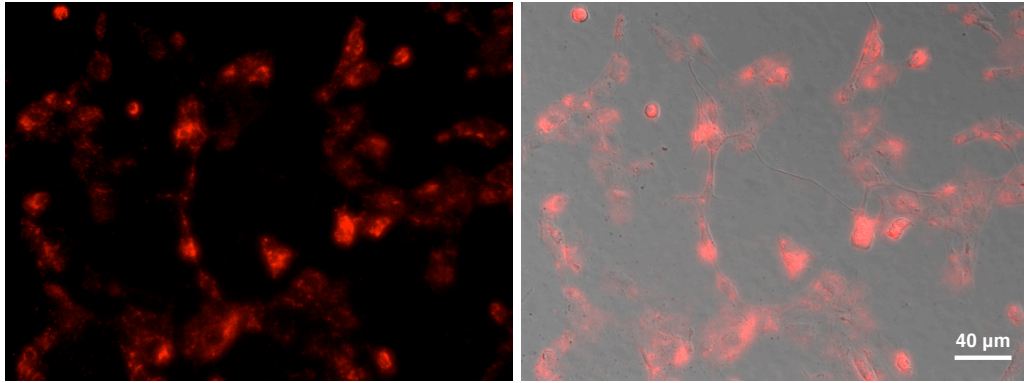

**Figure S1.** Fluorescence imaging of the living murine stromal MS-5 cells after incubation with SPN<sub>RD</sub> (50 μg/mL) at 37 °C for 0.5 h.

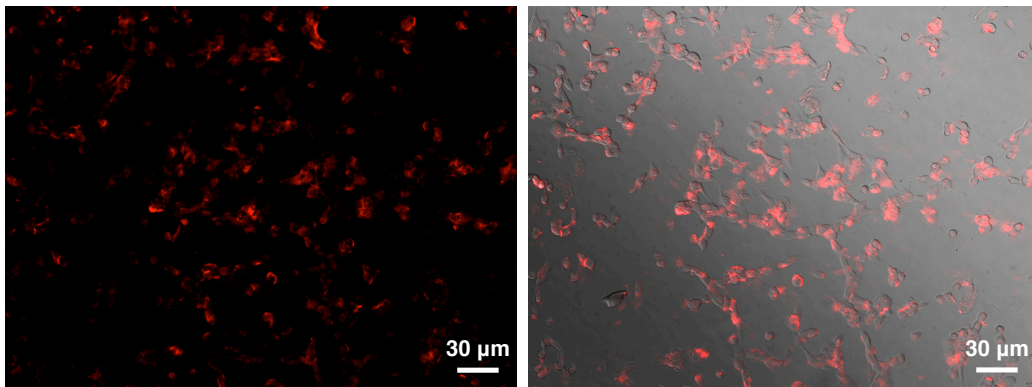

**Figure S2.** Fluorescence imaging of the living HRCC after incubation with SPN<sub>RD</sub> (50 μg/mL) at 37 °C for 0.5 h.
